# Supplementary material for: Matrix-assisted laser desorption ionization mass spectrometry profiling of plasma exosomes evaluates osteosarcoma metastasis
Source: PubMed Central journal article supplement — iScience. 2021 Jul 26;24(8):102906. doi: 10.1016/j.isci.2021.102906 (PMC8355924; doi:10.1016/j.isci.2021.102906), 2021-07-26
Supplement: mmc1.pdf [file mmc1.pdf]

iScience, Volume 24

## **Supplemental information**

**Matrix-assisted laser desorption ionization**

**mass spectrometry profiling of plasma**

**exosomes evaluates osteosarcoma metastasis**

**Zhenzhen Han, Cheng Peng, Jia Yi, Yiwen Wang, Qi Liu, Yi Yang, Shuping Long, Liang Qiao, and Yuhui Shen**

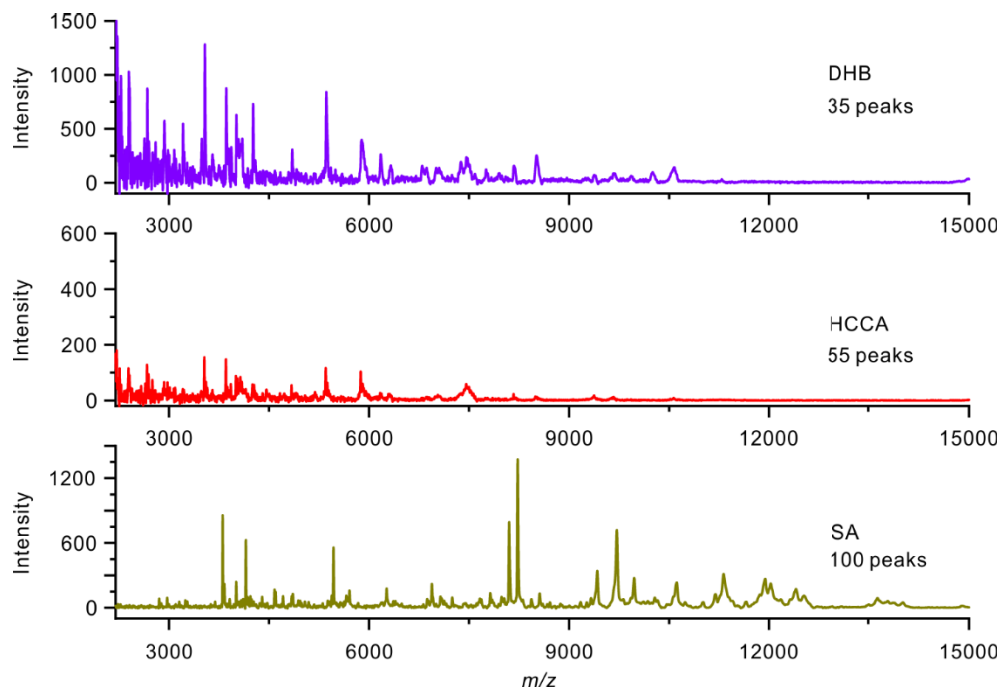

Figure S1. MALDI-TOF mass spectra of exosomes isolated from 143B cells acquired using DHB, HCCA, and SA matrices, respectively, related to Figure 1.

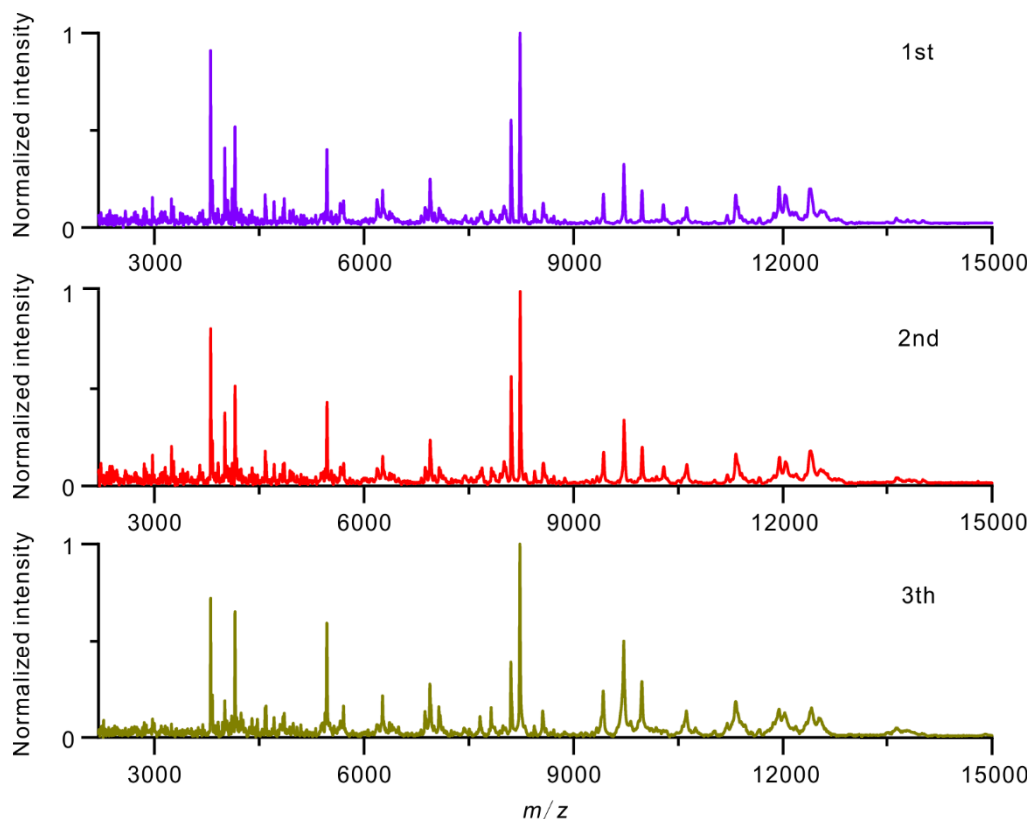

Figure S2. MALDI-TOF mass spectra of exosomes derived from 3 different batches of 143B cells, related to Figure 1.

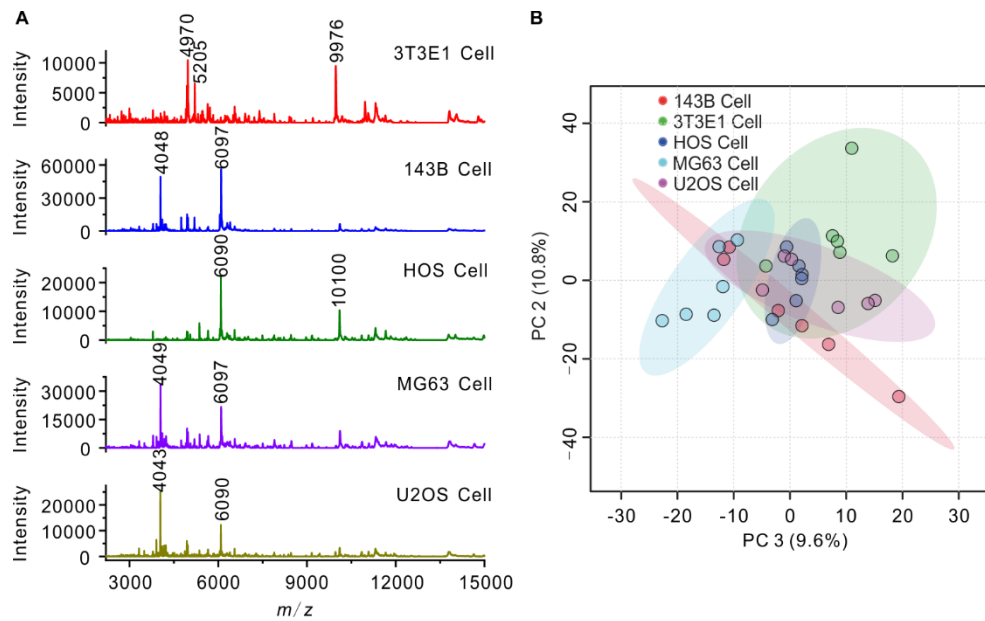

**Figure S3. MALDI-TOF mass spectra of different cell lines, and PCA analysis of the MALDI mass spectra, related to Figure 2.**

(A) MALDI-TOF mass spectra of 3T3E1, 143B, HOS, MG63 and U2OS cells. Main peaks of cells were labeled in the figure. (B) PCA score plot based on the MALDI-TOF mass spectra of the cells. Six replicates were performed on each cell line.

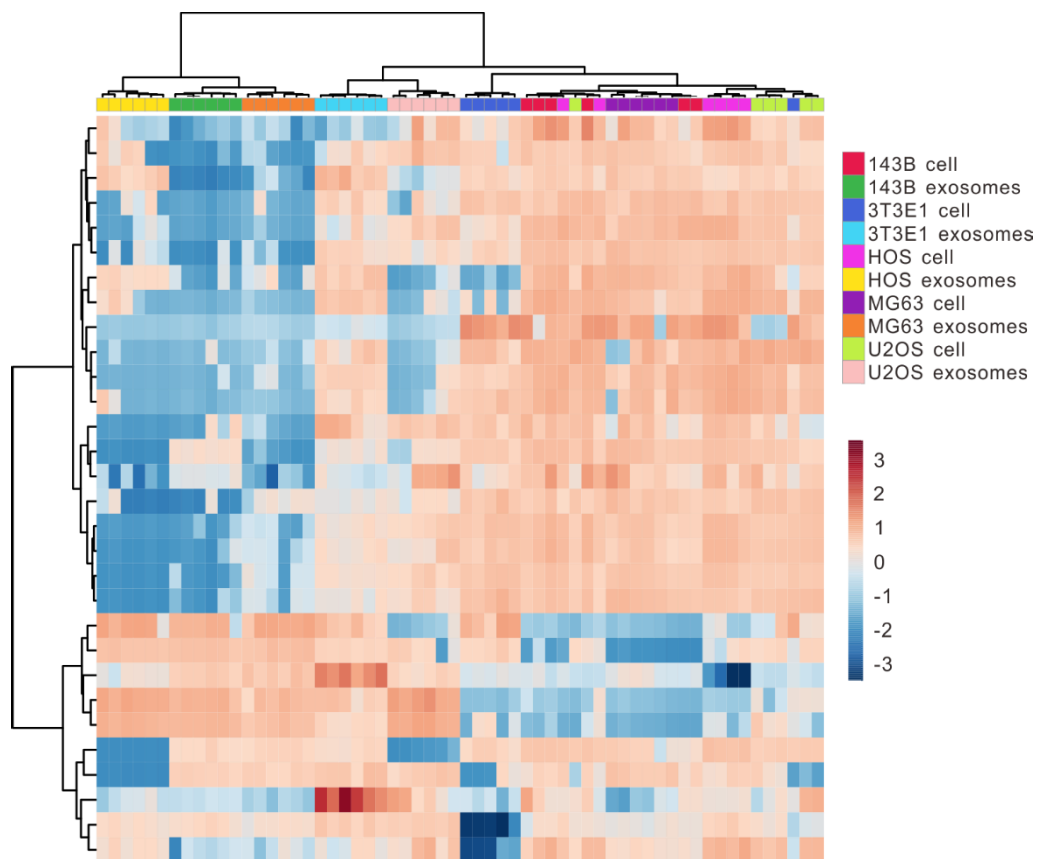

**Figure S4. Hierarchical clustering of the MALDI mass spectra of different cell lines and the corresponding exosomes, related to Figure 2.**

Hierarchical clustering of the MALDI-TOF mass spectra of 3T3E1, 143B, HOS, MG63 and U2OS cells and the corresponding exosomes in a heatmap using Euclidean distance measure and Ward linkage. Six replicates were performed on each sample.

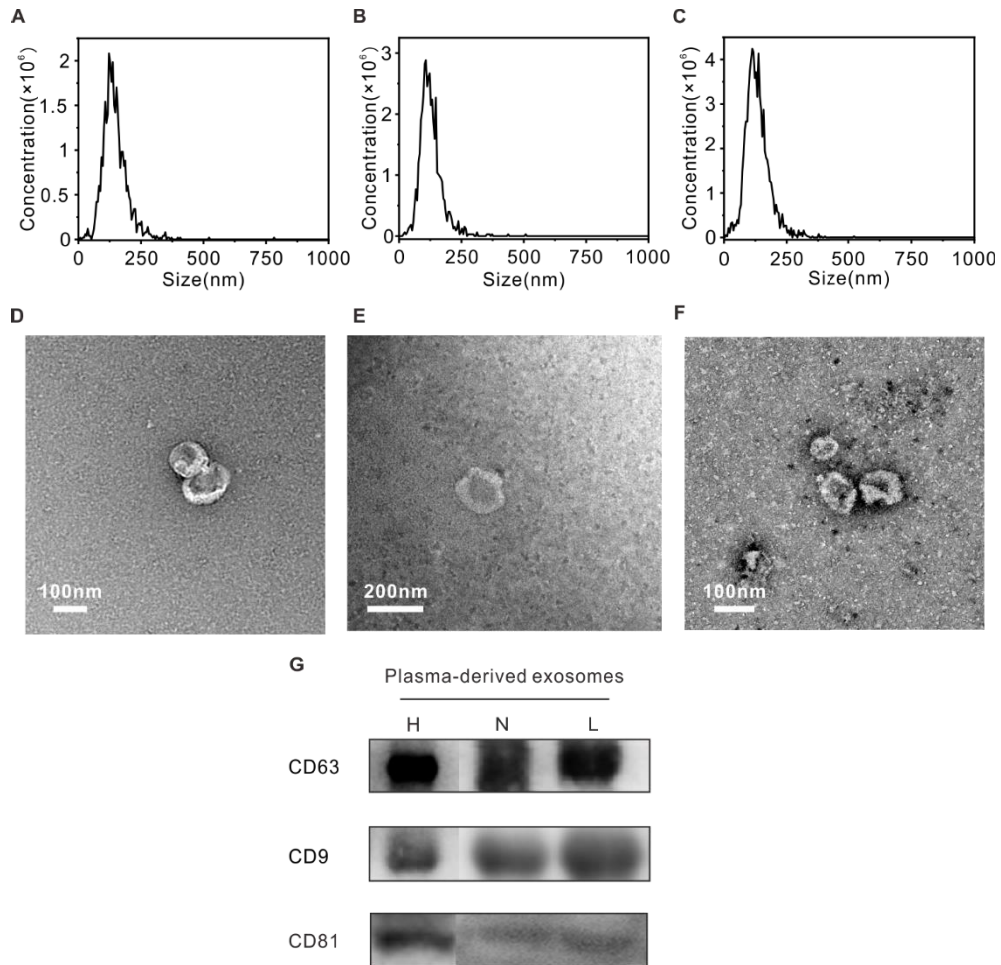

**Figure S5. NTA, TEM, and Western blot analyses of plasma-derived exosomes, related to Figure 3 and 4.**

NTA measurements (200-times dilution) and TEM micrographs of plasma-derived exosomes isolated from (A and D) healthy volunteers (H), (B and E) osteosarcoma non-lung metastasis patients (N), and (C and F) osteosarcoma lung metastasis patients (L), and (G) Western blot analysis on the samples. (D) and (F) Scale bar: 100 nm. (E) Scale bar: 200 nm.

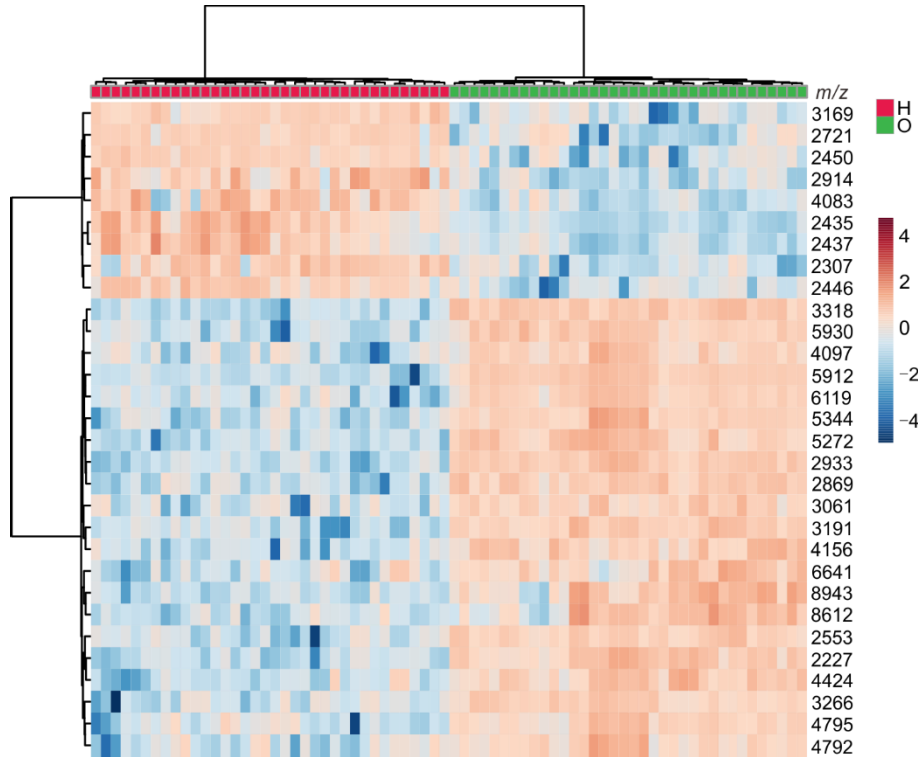

**Figure S6. Hierarchical clustering of the MALDI mass spectra of plasma-derived exosomes, related to Figure 3.**

Hierarchical clustering of the MALDI-TOF data of plasma-derived exosomes isolated from 12 healthy volunteers (H) and 12 osteosarcoma patients (O) shown as heatmap using Euclidean distance measure and Ward linkage. Three replicates were performed on each sample.

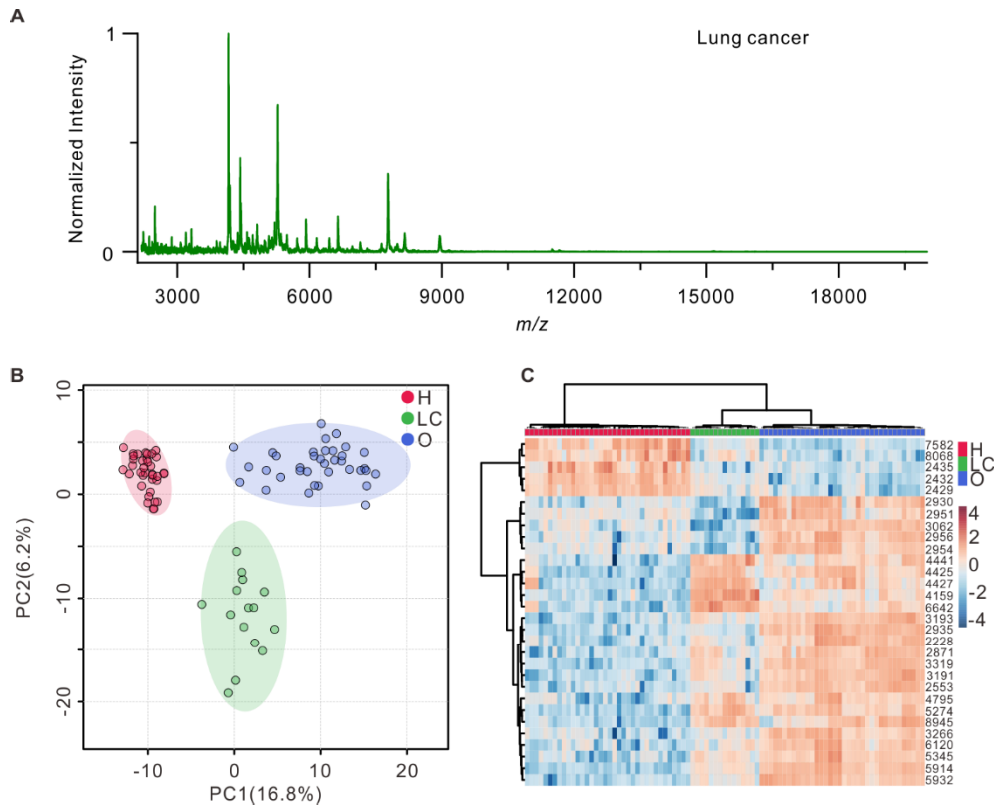

**Figure S7. MALDI-TOF mass spectra of plasma-derived exosomes for the discrimination of different cancers, related to Figure 3.**

(A) MALDI-TOF mass spectrum of plasma-derived exosomes isolated from a lung cancer patient. (B) PCA score plot based on the MALDI-TOF profile of plasma-derived exosomes. (C) Hierarchical clustering of the MALDI-TOF profile of plasma-derived exosomes shown as heatmap using Euclidean distance measure and Ward linkage. The cohorts include 12 healthy controls (H), 12 osteosarcoma patients (O), and 5 lung cancer patients (LC). Three replicates were performed on each sample.



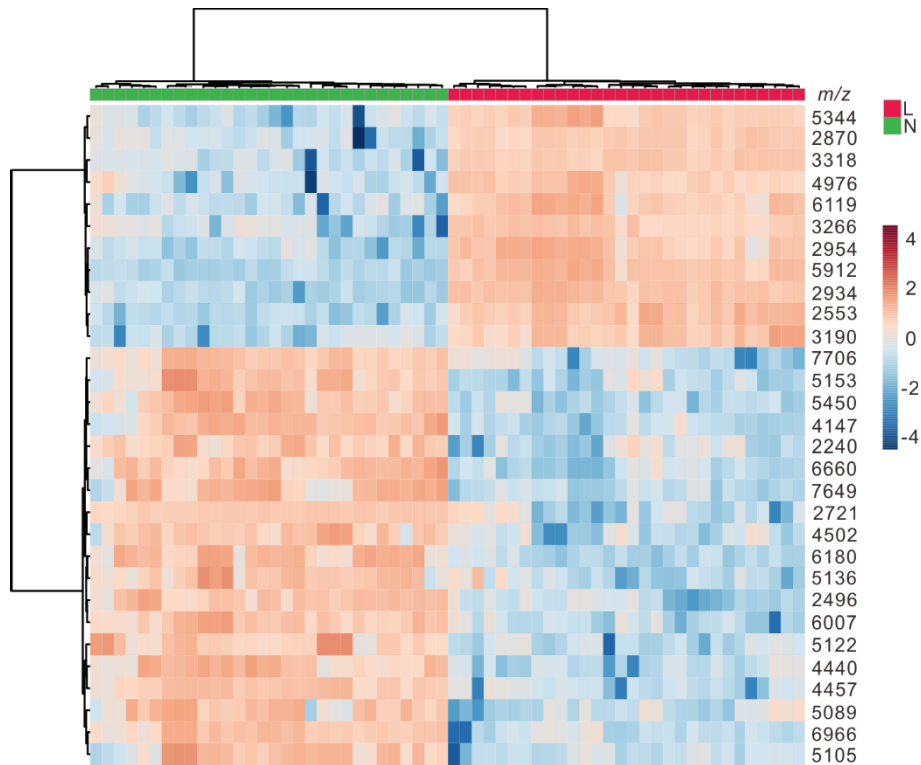

**Figure S8. Hierarchical clustering of the MALDI mass spectra of plasma-derived exosomes, related to Figure 4.**

Hierarchical clustering of the MALDI-TOF data of plasma-derived exosomes isolated from 10 osteosarcoma non-lung metastasis (N) and 10 lung metastasis (L) patients shown as heatmap using Euclidean distance measure and Ward linkage. Three replicates were performed on each sample.

Table S1 Common platforms for exosome characterization, related to Figure 1, Figure 4,  
and Figure S5

| Number | category                                    | Methods                                   |
|--------|---------------------------------------------|-------------------------------------------|
| 1      | size characterization                       | dynamic light scattering (DLS)            |
|        |                                             | nanoparticle tracking analysis (NTA)      |
|        |                                             | tunable resistive pulse sensing (TRPS)    |
| 2      | subgroup characterization                   | Western blot                              |
|        |                                             | enzyme-linked immunosorbent assay (ELISA) |
|        |                                             | nano-flow cytometry                       |
| 3      | proteomic characterization                  | mass spectrometry                         |
| 4      | genomic and transcriptomic characterization | high throughput sequencing                |

Table S2 Information of Clinical samples, related to Figure 3-5, and S6-S8

| Sample No. | Age | Gender | Category     | Stage               |
|------------|-----|--------|--------------|---------------------|
| 1          | 15  | Male   | Osteosarcoma | Lung metastasis     |
| 2          | 13  | Female | Osteosarcoma | Lung metastasis     |
| 3          | 25  | Male   | Osteosarcoma | Lung metastasis     |
| 4          | 19  | Female | Osteosarcoma | Lung metastasis     |
| 5          | 34  | Male   | Osteosarcoma | Lung metastasis     |
| 6          | 13  | Male   | Osteosarcoma | Lung metastasis     |
| 7          | 17  | Female | Osteosarcoma | Lung metastasis     |
| 8          | 58  | Male   | Osteosarcoma | Lung metastasis     |
| 9          | 16  | Male   | Osteosarcoma | Lung metastasis     |
| 10         | 38  | Male   | Osteosarcoma | Lung metastasis     |
| 11         | 35  | Female | Osteosarcoma | Lung metastasis     |
| 12         | 20  | Male   | Osteosarcoma | Lung metastasis     |
| 13         | 25  | Male   | Osteosarcoma | Lung metastasis     |
| 14         | 19  | Male   | Osteosarcoma | Lung metastasis     |
| 15         | 16  | Male   | Osteosarcoma | Lung metastasis     |
| 16         | 15  | Female | Osteosarcoma | Lung metastasis     |
| 17         | 38  | Male   | Osteosarcoma | Lung metastasis     |
| 18         | 18  | Male   | Osteosarcoma | Lung metastasis     |
| 19         | 46  | Female | Osteosarcoma | Lung metastasis     |
| 20         | 62  | Male   | Osteosarcoma | Lung metastasis     |
| 21         | 69  | Female | Osteosarcoma | Non-lung metastasis |
| 22         | 19  | Male   | Osteosarcoma | Non-lung metastasis |
| 23         | 16  | Female | Osteosarcoma | Non-lung metastasis |
| 24         | 24  | Female | Osteosarcoma | Non-lung metastasis |
| 25         | 17  | Male   | Osteosarcoma | Non-lung metastasis |
| 26         | 12  | Male   | Osteosarcoma | Non-lung metastasis |
| 27         | 16  | Male   | Osteosarcoma | Non-lung metastasis |
| 28         | 11  | Female | Osteosarcoma | Non-lung metastasis |
| 29         | 6   | Male   | Osteosarcoma | Non-lung metastasis |
| 30         | 33  | Female | Osteosarcoma | Non-lung metastasis |
| 31         | 25  | Female | Osteosarcoma | Non-lung metastasis |
| 32         | 38  | Male   | Osteosarcoma | Non-lung metastasis |
| 33         | 14  | Male   | Osteosarcoma | Non-lung metastasis |
| 34         | 20  | Male   | Osteosarcoma | Non-lung metastasis |
| 35         | 19  | Female | Osteosarcoma | Non-lung metastasis |
| 36         | 30  | Male   | Osteosarcoma | Non-lung metastasis |
| 37         | 14  | Male   | Osteosarcoma | Non-lung metastasis |
| 38         | 17  | Male   | Osteosarcoma | Non-lung metastasis |
| 39         | 14  | Male   | Osteosarcoma | Non-lung metastasis |
| 40         | 5   | Male   | Osteosarcoma | Non-lung metastasis |

|    |    |        |             |    |
|----|----|--------|-------------|----|
| 41 | 67 | Female | Lung cancer | NA |
| 42 | 58 | Female | Lung cancer | NA |
| 43 | 55 | Female | Lung cancer | NA |
| 44 | 51 | Female | Lung cancer | NA |
| 45 | 60 | Male   | Lung cancer | NA |
| 46 | 14 | Male   | Healthy     | NA |
| 47 | 10 | Male   | Healthy     | NA |
| 48 | 32 | Female | Healthy     | NA |
| 49 | 56 | Male   | Healthy     | NA |
| 50 | 45 | Female | Healthy     | NA |
| 51 | 19 | Male   | Healthy     | NA |
| 52 | 17 | Male   | Healthy     | NA |
| 53 | 26 | Male   | Healthy     | NA |
| 54 | 30 | Female | Healthy     | NA |
| 55 | 39 | Female | Healthy     | NA |
| 56 | 25 | Male   | Healthy     | NA |
| 57 | 50 | Male   | Healthy     | NA |
